# Supplementary material for: Antagonistic Smad transcription factors control the dauer/non-dauer switch in C. elegans
Source: Oxford University Press journal article supplement (doi:10.1242/dev.043752), 2010-01-16
Supplement: dev043752tables1.pdf [file dev043752tables1.pdf]

**Table S1. Primers used in this study**

|                                | Forward                              | Reverse                                                      |
|--------------------------------|--------------------------------------|--------------------------------------------------------------|
| <b>Cloning</b>                 |                                      |                                                              |
| <i>daf-8::gfp</i>              | GATAGGTAGGAAAAAGCAACGAAG             | GAAAAGTTCTTCTCCTTTACTCATAGTTCTGGATGAACATATACG                |
| <i>daf-8::FLAG</i>             | GATAGGTAGGAAAAAGCAACGAAG             | TTGGATCCTCAGATCTTATCGTCGTCATCCTTGTAATCAGTTCTGGATGAACATATACG  |
| <i>daf-14::FLAG</i>            | GGGCTCGAGCTGTCTGACTTTTCTGGACTGCTCTAC | TTAAGCTTTCAGATCTTATCGTCGTCATCCTTGTAATCTGATCGGGATCCTATTTCCGG  |
| <i>daf-3::FLAG</i>             | AAACTCGAGCCGAGGTCATGTGCACTCTCTTG     | TTTCTCGAGTCAGATCTTATCGTCGTCATCCTTGTAATCGTCATCACTGACGTTGATTCC |
| <i>daf-8 cDNA in pBSIIKS</i>   | CCCGGATCCATGGACGATTTTCCTTCACCAG      | TTTGAATTCCTAAGTTCTGGATGAACATATAC                             |
| <i>daf-8 cDNA in pGEX4T-1</i>  | CCCGGATCCGACGATTTTCCTTCACCAGAACC     | TTTGAATTCCTAAGTTCTGGATGAACATATAC                             |
| <i>daf-14 cDNA in pBSIIKS</i>  | AAACTCGAGATGTACCCAGATCAAGTTCAC       | AAACTCGAGTCATGATCGGGATCCTATTTCCG                             |
| <i>daf-14 cDNA in pGEX4T-1</i> | AAACTCGAGTACCCAGATCAAGTTCACTTAC      | AAACTCGAGTCATGATCGGGATCCTATTTCCG                             |
| <i>daf-3 cDNA in pGEX4T-1</i>  | TTTCTCGAGAAGCTAATAGCAACTTCTCTTC      | TTTCTCGAGTTAGTCATCACTGACGTTG                                 |
| <b>qPCR</b>                    |                                      |                                                              |
| <i>daf-7</i>                   | AACGAAATTCTCGACCAGCTGA               | TGGATCTTTGGCGGTGTAGAAT                                       |
| <i>daf-1</i>                   | CAGCAGTCATCCACGTGGCT                 | TCCGTCTCGCGTAGAGGATCT                                        |
| <i>daf-4</i>                   | GGAAAAGTTTTCAAGGCGCAA                | CGCACACAAATTCGACGATACTT                                      |
| <i>daf-8</i>                   | CGTCTACTGTCTCACGAATGTGC              | GGAGCTCCCATACAAGTGAGTACAC                                    |
| <i>daf-3</i>                   | CCGAACTTGTACGGGTTTCCAAC              | TGCCTTGTTGGGACGTATGGTTT                                      |
| <i>lag-2</i>                   | TTCCTCTTACTCCTCACCTGCCTCC            | GCGAGTGGGACTCTGTGACAATTC                                     |
| <i>act-2</i>                   | GGACTTGTACGCCAACACTG                 | CACATCTGTTGGAAGGTGGA                                         |
| <b>ChIP</b>                    |                                      |                                                              |
| <i>daf-7 BD2</i>               | GCAAAACGGCCTAACTTCAT                 | CGAAATTTAGCTTTGCATCTGC                                       |
| <i>daf-8 BD1</i>               | CTTACTCCGTAATGTTGGCATTTC             | TGGCTTCAAAGACTGGTCAGGT                                       |
| <i>daf-8 BD3</i>               | CTTTAAAAAAGAGCAGAGTTGAGAG            | GGCTAATTTGAGAGACACATTCTAA                                    |
